# Supplementary material
Source: Springer Nature journal article supplement (https://www.springermedizin.de/resource/supplementary/12879_2010_1276_MOESM1_ESM.pdf/9442242)
Supplement: MOESM1 [file 9442242]

**Additional file 1 - Number of respondents by survey day, April 28-May26 2009.**

Table A1 shows the number of respondents who completed the survey on each survey day.

\*Survey day starts at noon on the day and continues until the target number of respondents initiated the survey.

Table A1: Number of respondents by survey day, April 28-May26 2009

| Survey day *  | N   |
|---------------|-----|
| April 28 2009 | 442 |
| April 29 2009 | 52  |
| April 30 2009 | 50  |
| May 1 2009    | 44  |
| May 2 2009    | 48  |
| May 3 2009    | 49  |
| May 4 2009    | 47  |
| May 5 2009    | 49  |
| May 6 2009    | 49  |
| May 7 2009    | 47  |
| May 8 2009    | 48  |
| May 9 2009    | 45  |
| May 10 2009   | 44  |
| May 11 2009   | 47  |
| May 12 2009   | 49  |
| May 19 2009   | 91  |
| May 26 2009   | 89  |
